1 **In Vitro Activities of Daptomycin Combined with Fosfomycin or Rifampin on**  
2 **Planktonic and Adherent Linezolid-resistant *Enterococcus faecalis***

3 Jin-xin Zheng<sup>#1,2</sup>, Xiang Sun<sup>#1</sup>, Zhi-wei Lin<sup>#1</sup>, Guo-bin Qi<sup>#2</sup>, Hao-peng Tu<sup>1</sup>, Yang Wu<sup>2</sup>,  
4 Si-bo Jiang<sup>3</sup>, Zhong Chen<sup>1,2</sup>, Qi-wen Deng<sup>1</sup>, Di Qu<sup>\*2</sup>, Zhi-jian Yu<sup>\*1</sup>

5

6 <sup>1</sup>Department of Infectious Diseases and the Key Lab of Endogenous Infection,  
7 Shenzhen Nanshan People's Hospital and The 6th Affiliated Hospital of Shenzhen  
8 University Health Science Center, Shenzhen 518052, China.

9 <sup>2</sup>Key Laboratory of Medical Molecular Virology of Ministries of Education and  
10 Health, School of Basic Medical Science and Institutes of Biomedical Sciences,  
11 Shanghai Medical College of Fudan University, Shanghai 200032, China.

12 <sup>3</sup>Department of Pharmaceutics, University of Florida, Orlando 32827, USA

13

14 # Jin-xin Zheng, Xiang Sun, Zhi-wei Lin and Guo-bin Qi contributed equally to this  
15 paper.

16 \***Corresponding author:** Di Qu: telephone: (+86)021-54237568, fax:

17 (+86)021-54237568, e-mail: [dqu@fudan.edu.cn](mailto:dqu@fudan.edu.cn);

18 Zhi-jian Yu: telephone: (+86)0755-26553111, fax: (+86) 0755-26553111, e-mail:

19 [yuzhijiansmu@163.com](mailto:yuzhijiansmu@163.com);

20

21 **Running title:** Daptomycin and fosfomycin against *E. faecalis* biofilms

22

23

24

25

26

27

28

29

30

31 **Abstract**

32 This study aimed to explore daptomycin combined with fosfomycin or rifampin  
33 against the planktonic and adherent linezolid-resistant isolates of *Enterococcus*  
34 *faecalis*. Four linezolid-resistant isolates of *E. faecalis* which formed biofilms were  
35 collected for this study. Biofilm biomasses were detected by crystal violet staining.  
36 The adherent cells in the mature biofilms were counted by CFU numbers and  
37 observed by confocal laser scanning microscope (CLSM). In time-killing studies,  
38 daptomycin combined with fosfomycin or rifampin (4xMIC) demonstrated  
39 bactericidal activities on the planktonic cells, and daptomycin combined with  
40 fosfomycin killed more planktonic cells (at least 2- $\log_{10}$  CFU/ml) than daptomycin or  
41 fosfomycin alone. Daptomycin alone showed activities against the mature biofilms,  
42 and daptomycin combined with fosfomycin (16xMIC) demonstrated significantly  
43 more activity than daptomycin or fosfomycin alone against the mature biofilms in  
44 three of the four isolates. Daptomycin alone effectively killed the adherent cells, and  
45 daptomycin combined with fosfomycin (16xMIC) killed more adherent cells than  
46 daptomycin or fosfomycin alone in these mature biofilms. The high concentrations of  
47 daptomycin (512 mg/L) combined with fosfomycin indicated more activity than  
48 16xMIC of daptomycin combined with fosfomycin on the adherent cells and the  
49 mature biofilms. The addition of rifampin increased the activity of daptomycin against  
50 the biofilms and the adherent cells of FB-14 and FB-80 isolates, but was not observed  
51 in FB-1 and FB-2 isolates. In conclusion, daptomycin combined with fosfomycin  
52 works effectively against the planktonic and adherent linezolid-resistant isolates of *E.*  
53 *faecalis*. The role of rifampin in these linezolid-resistant isolates is discrepant and  
54 needs more studies.

55

56 **KEYWORDS:** *Enterococcus faecalis*; linezolid-resistant; biofilm; daptomycin;  
57 fosfomycin; rifampin;

58

59 *Enterococcus faecalis* has become one of the most common pathogens of  
60 nosocomial infections in the last two decades, which usually causes urinary tract,  
61 respiratory tract, peritoneum, and bloodstream infections (1). Of particular concern is  
62 the increasing difficult treatment of *E. faecalis* as it has intrinsic and acquired  
63 resistance to many antimicrobial agents. The outbreaks of vancomycin-resistant  
64 enterococci (VRE) infections attracted global attention due to their extensive  
65 resistance to a plethora of antibiotics in recent years (2). Linezolid, was the first  
66 antimicrobial agent of the oxazolidinones drugs to treat VRE infections, but the  
67 growing cases of linezolid-resistant enterococci have emerged in hospitals with its  
68 wide use (3).

69 In addition to the drug resistance problem, *E. faecalis* has been found with a high  
70 capacity for biofilm formation, which makes infections more difficulty to treat. In  
71 Britain, 100% of *E. faecalis* strains from bloodstream infections had the ability to  
72 form biofilms, and another study from Japan indicated that all of 352 *E. faecalis*  
73 isolates in urinary tract infections formed biofilms (4, 5). Other studies also showed  
74 that about 50-90% of *E. faecalis* clinical isolates formed biofilms (6-8). Recently,  
75 among 265 *E. faecalis* strains from China, 90% of linezolid-resistant isolates were  
76 found with different levels of biofilm formation (9).

77 Biofilms are enclosed within an exopolymer matrix that can restrict the diffusion  
78 and penetration of antimicrobials, and thus make them very difficult to erase (10). At  
79 present, only a few antimicrobials showed activities on enterococci biofilms. Previous  
80 research found that the daptomycin has more activity than linezolid against  
81 biofilm-forming *E. faecalis*, and the addition of gentamicin to daptomycin  
82 significantly improved bactericidal activity. However, the addition of rifampin  
83 decreased the activity of daptomycin against both *E. faecalis* and VRE (11). Another  
84 study indicated that the fosfomycin had activity against planktonic and adherent *E.*  
85 *faecalis*, and found the rifampin had no activity on planktonic or adherent *E. faecalis*  
86 (12). However, Tang HJ *et al.* found that a synergistic effect was evident using  
87 fosfomycin plus rifampin on planktonic and adherent *E. faecalis* (13). So the effective  
88 antimicrobials which work against *E. faecalis* biofilms are still little known and

89 controversial, and there are no reports about how to treat the linezolid-resistant *E.*  
90 *faecalis* biofilms up to now. Thus, this study aims to explore the daptomycin, rifampin,  
91 fosfomycin alone, and daptomycin combined with rifampin or fosfomycin against the  
92 linezolid-resistant *E. faecalis* biofilms.

93

## 94 MATERIALS AND METHODS

95 **Bacterial strains.** From January 2014 to December 2016, ten linezolid-resistant *E. faecalis*  
96 isolates were collected from inpatients at 6th Affiliated Hospital of Shenzhen University Health  
97 Science Center in China. Among these linezolid-resistant isolates, four strains (FB-1, FB-2, FB-14,  
98 FB-80) which formed biofilms were used for all in vitro experiments. The strains were identified  
99 with a Phoenix 100 automated microbiology system (BD, Franklin Lakes, NJ, USA) and then two  
100 subcultured generations were re-identified with matrix-assisted laser desorption ionization  
101 time-of-flight mass spectrometry (IVD MALDI Biotyper, Germany). *E. faecalis* ATCC 29212 and  
102 OG1RF (ATCC47077) were used as reference strains. All procedures involving human  
103 participants were performed in accordance with the ethical standards of Shenzhen University and  
104 with the 1964 Helsinki declaration and its later amendments. For this type of study, formal consent  
105 is not required.

106 **Antimicrobial agents.** Ampicillin (catalogue no. A9518), Vancomycin (catalogue no.  
107 V2002), Linezolid (catalogue no. PZ0014), Daptomycin (catalogue no. SBR00014), Rifampin  
108 (catalogue no.R3501), Gentamicin (catalogue no. E003632) and glucose-6-phosphate (catalogue  
109 no. V900924) were purchased from SIGMA-ALDRICH (Shanghai, China). Fosfomycin  
110 (catalogue no. HY-B1075) was purchased from MedChemExpress (Shanghai, China). The media  
111 were supplemented with 25 mg/liter glucose-6-phosphate for testing of fosfomycin and with 50  
112 mg/liter Ca<sup>2+</sup> for testing of daptomycin in all vitro experiments.

113 **Antimicrobial susceptibility testing.** The MICs and the logarithmic MBC (MBC<sub>log</sub>) values  
114 for ampicillin, vancomycin, linezolid, daptomycin, rifampin and gentamicin were determined by  
115 the broth macrodilution method in cation-adjusted Mueller-Hinton broth (CAMHB), and the MICs  
116 values for fosfomycin were detected by the agar dilution method according to the Clinical and  
117 Laboratory Standards Institute guidelines (CLSI-M100-S26). All experiments were performed in  
118 triplicate. The sensitivity results of antimicrobial agents were confirmed based on

119 CLSI-M100-S26.

120 **Time-killing assay.** The activities of daptomycin, rifampin, fosfomycin alone, and  
121 daptomycin combined with rifampin or fosfomycin (4xMIC) were determined by time-kill studies  
122 conducted with cells in the logarithmic growth phase based on the reference method (12). Briefly,  
123 the tests were performed in 14ml Polypropylene Round-Bottom Tube (FALCON 352059) in a  
124 final volume of 5 ml CAMHB and were further incubated at 37°C with shaking. At the time points  
125 of 6, 12, and 24 h, 1-ml aliquots were sampled and washed with 0.9% saline solution. Ten-fold  
126 dilutions were then plated on Muller-Hinton agar, and the numbers of CFU were determined.  
127 Medium without antimicrobial agents was used as the growth control. Bactericidal activity was  
128 defined as a  $\geq 99.9\%$  (i.e.,  $\geq 3\text{-log}_{10}$  CFU/ml) reduction of the initial bacterial count after 24 h, and  
129 the initial inoculum was  $1.0\sim 3.0 \times 10^7$  CFU/ml. All experiments were performed in triplicate.

130 **Biofilm biomass assay.** Biofilm biomasses of *E. faecalis* isolates were detected according to  
131 the reference method with minor modifications (8). Briefly, the *E. faecalis* isolates were cultivated  
132 overnight in Tryptic Soy Broth (TSB) at 37°C. Overnight cultures were diluted 1:200 in 200  $\mu$ l of  
133 TSBG (TSB with 0.25% glucose) ( $1.0 - 3.0 \times 10^7$  CFU/ml) and inoculated into 96 polystyrene  
134 microtiter plates (Costar3599, Corning). After 24 h of static incubation at 37°C (mature biofilm),  
135 the supernatant was discarded and plates were washed thrice with 0.9% saline to remove  
136 unattached cells, then the fresh TSBG containing antimicrobial agents was added to each well  
137 (200  $\mu$ l/well), and the TSBG without antimicrobials was used as the growth control. After 72h of  
138 static incubation at 37°C (the medium replaced daily), the supernatant was discarded and plates  
139 were washed thrice with deionized water to remove unattached cells, stained with 1% crystal  
140 violet (CV) for 20 min at room temperature and rinsed with distilled water. Last, the CV was  
141 solubilized in ethanol-acetone (80:20, vol/vol), and optical density at 570 nm ( $OD_{570}$ ) was  
142 determined. The OG1RF (ATCC47077) strain was used as biofilm positive control. Each assay  
143 was performed in triplicate at least three times.

144 **Bacteria counting in biofilm assay.** Bacteria in *E. faecalis* biofilms were determined  
145 according to the reference method (14). The *E. faecalis* isolates overnight cultures were 1:200  
146 diluted with TSBG and inoculated into 24 polystyrene microtiter plates (1ml/well; Costar3524,  
147 Corning). After 24 h of static incubation at 37°C (mature biofilm), the supernatant was discarded  
148 and plates were washed thrice with 0.9% saline, then the fresh TSBG containing antimicrobial

149 agents was added to each well (1ml/well), and the TSBG without antimicrobials was used as the  
150 growth control. After 72h of static incubation at 37°C (the medium replaced daily), the  
151 supernatant was discarded and plates were washed thrice with 0.9% saline, then the bacteria in the  
152 biofilms were collected by scratching the wall of the wells with a flat end toothpick and suspended  
153 in 0.9% saline. The bacteria suspension was washed twice with 0.9% saline, ten-fold diluted and  
154 then plated on Tryptic Soy agar, and the numbers of CFU were determined. All experiments were  
155 performed in triplicate.

156 **Detection of cell viability in mature biofilms by confocal laser scanning microscope**  
157 **(CLSM).** The effect of antimicrobial agents on cell viability in mature biofilms was determined  
158 using the Live/Dead Bacterial Viability method (Live/Dead BacLight, Molecular Probes, USA).  
159 The *E. faecalis* isolates overnight cultures were 1:200 diluted with TSBG and inoculated into  
160 cell-culture dishes (2ml/well; WPI, USA). After 24 h of static incubation at 37°C (mature biofilm),  
161 the supernatant was discarded and plates were washed thrice with 0.9% saline, then the fresh  
162 TSBG containing antimicrobial agents was added to each well (2ml/well), and the TSBG without  
163 antimicrobials was used as the growth control. After 72h of static incubation at 37°C (the medium  
164 replaced daily), the supernatant was discarded and plates were washed thrice with 0.9% saline.  
165 Then the mature biofilms were stained with SYTO 9 and propidium iodide (PI) at room  
166 temperature for 15 min, then observed under a Leica TCS SP8 CLSM with a 63 × 1.4-NA  
167 oil-immersion objective. Further, image analysis was performed using IMARIS 7.0.0 software  
168 (Bitplane) and the fluorescence quantities of biofilm were determined using Leica LAS AF Lite  
169 4.0 software. All experiments were performed in triplicate and representative images were shown.

170 **Statistical analysis.** The data were analysed using Student's t test or nonparametric  
171 Mann–Whitney U test. *P* values <0.05 were regarded as statistically significant. All data was  
172 analyzed in SPSS software package (version 16.0, Chicago, IL,USA).

173

## 174 **RESULTS**

175 **Antimicrobial susceptibility.** The in vitro susceptibilities of planktonic *E.*  
176 *faecalis* cells were summarized in **Table 1**. All the four *E. faecalis* isolates were  
177 sensitive to ampicillin and vancomycin, but resistant to linezolid. Among these four *E.*  
178 *faecalis* isolates, three isolates were sensitive to daptomycin and fosfomycin, but the

179 MIC of daptomycin to one isolate (FB-14) has reached to 8 mg/L and one isolate  
180 (FB-2) has intermediate resistance to fosfomicin. Three isolates with low level  
181 resistant to rifampin, and three isolates with the high level gentamicin MICs ( $\geq 512$   
182 mg/L) in this study.

183 **Antimicrobial activity on planktonic *E. faecalis* cells.** The activities of  
184 daptomycin, rifampin, fosfomicin (all with 4xMIC) on planktonic *E. faecalis* cells  
185 were determined by time-killing studies. Daptomycin combined with fosfomicin or  
186 rifampin demonstrated bactericidal activities, and the daptomycin combined with  
187 fosfomicin showed better bactericidal effect than combined with rifampin on FB-1  
188 and FB-2 isolates (**Fig. 1A and B**). Daptomycin alone, or combined with rifampin or  
189 fosfomicin indicated bactericidal activities, and daptomycin combined with  
190 fosfomicin showed best bactericidal effect on FB-14 and FB-80 isolates. Among all  
191 the four isolates, daptomycin combined with fosfomicin killed more planktonic *E.*  
192 *faecalis* cells (at least 2- $\log_{10}$  CFU/ml) than daptomycin or fosfomicin alone at the  
193 24h of the time-kill study. It was noteworthy that rifampin or fosfomicin alone  
194 inhibited the growth of planktonic *E. faecalis* cells before 6h, but the number of  
195 bacteria increased after 6h or 12h of incubation in these four isolates (**Fig. 1**).

196 **Antimicrobial activity on the mature biofilms of *E. faecalis*.** First, the  
197 activities of daptomycin, rifampin, fosfomicin (all with 16xMIC) on the mature  
198 biofilms of these four linezolid-resistant isolates were explored by microplate method  
199 with crystal violet staining. The median OD<sub>570</sub> value was 1.45 for OG1RF (biofilm  
200 positive control strain). The daptomycin alone showed activities on the mature  
201 biofilms of FB-2, FB-14 and FB-80 isolates, and rifampin alone exhibited activity  
202 against the mature biofilms of FB-14 and FB-80 isolates (**Fig. 2**). Interestingly,  
203 daptomycin combined with fosfomicin demonstrated significantly more activity than  
204 daptomycin or fosfomicin alone against the mature biofilms of FB-2, FB-14 and  
205 FB-80 isolates. The addition of rifampin increased the activity of daptomycin against  
206 the biofilms of FB-14 and FB-80 isolates. However, daptomycin, rifampin and  
207 fosfomicin (all with 16xMIC) had no effect on the mature biofilm of FB-1 (**Fig. 2A**).  
208 Subsequently, we increased the concentrations of daptomycin from 16xMIC to 512



209 mg/L, and found that the high concentrations of daptomycin (512 mg/L) combined  
210 with fosfomycin also indicated good effect on the mature biofilm of FB-1 (**Fig. 3A**).  
211 Additionally, the high concentrations of daptomycin (512 mg/L) combined with  
212 fosfomycin showed more activity than 16xMIC of daptomycin combined with  
213 fosfomycin against the mature biofilms of these four linezolid-resistant isolates (**Fig.**  
214 **3**).

215 **Antimicrobial agents killed the adherent cells in the mature biofilms of *E.***  
216 ***faecalis*.** How daptomycin, rifampin, and fosfomycin killed the adherent cells in the  
217 mature biofilms of *E. faecalis* were determined by the CFU numbers. First, the effects  
218 of these three agents (all with 16xMIC) on the adherent cells in the mature biofilms  
219 were detected and we found that daptomycin alone effectively killed the adherent  
220 cells in these mature biofilms of the four linezolid-resistant isolates (**Fig. 4**).  
221 Interestingly, we also found that daptomycin combined with fosfomycin killed more  
222 adherent cells than daptomycin or fosfomycin alone in these mature biofilms. The  
223 addition of rifampin also increased the activity of daptomycin against the adherent  
224 cells in the mature biofilms of FB-14 and FB-80 isolates. When the concentrations of  
225 daptomycin were increased from 16xMIC to 512 mg/L, we found that the high  
226 concentrations of daptomycin (512 mg/L) combined with fosfomycin showed  
227 significantly more killing activity than 16xMIC of daptomycin combined with  
228 fosfomycin on the adherent cells in the mature biofilms of the four linezolid-resistant  
229 isolates (**Fig. 5**).

230 **Effects of daptomycin and fosfomycin on the adherent cells in the mature**  
231 **biofilms by CLSM.** The effects of daptomycin and fosfomycin on cell viability in  
232 mature biofilms were detected by CLSM (rifampin was excepted as its red solution  
233 influenced the propidium iodide, which stained the dead cells with red fluorescence).  
234 As the **Fig. 6-9** indicated, daptomycin alone had effect on the adherent cells in these  
235 mature biofilms of the four linezolid-resistant isolates. Similar to the above results,  
236 daptomycin combined with fosfomycin showed stronger effect than daptomycin or  
237 fosfomycin alone, and the high concentrations of daptomycin (512 mg/L) combined  
238 with fosfomycin also indicated significantly stronger effect than 16xMIC of



239 daptomycin combined with fosfomycin on the adherent cells in the mature biofilms.

240

## 241 **DISCUSSION**

242 The combination of daptomycin and fosfomycin has been explored in different *E.*  
243 *faecalis* isolates. In the later 1980s, the combination of daptomycin and fosfomycin  
244 exhibited consistent synergistic bactericidal activity against *E. faecalis* isolates with  
245 high-level gentamicin resistance Three isolates with low level resistant to rifampin  
246 (15). Subsequently, fosfomycin was found to have synergy with daptomycin against  
247 vancomycin-resistant isolates of *E. faecium* from renal transplant patients and was  
248 also found to enhance the activity of daptomycin against vancomycin-resistant  
249 isolates of *E. faecalis* (16, 17). However, another study indicated that fosfomycin had  
250 no synergistic bactericidal effect with daptomycin on the planktonic and adherent *E.*  
251 *faecalis* (ATCC19433) (18). In this study, the combination of daptomycin and  
252 fosfomycin showed high bactericidal activity and a synergistic effect on the  
253 planktonic and adherent linezolid-resistant isolates of *E. faecalis*. Our results were  
254 similar with the high-level gentamicin resistant or vancomycin-resistant isolates of *E.*  
255 *faecalis* (15-17), but different from the *E. faecalis* ATCC19433, which was sensitive  
256 to vancomycin or linezolid (18). Why the combination of daptomycin and fosfomycin  
257 has a different effect on the linezolid-sensitive and resistant isolates of *E. faecalis* is  
258 still unknown and needs further exploration.

259 The high-dose daptomycin (10 mg/kg/day) plus fosfomycin has been proven to be  
260 safe and effective in treating *S. aureus* endocarditis (19). Another study also found  
261 that the high-dose daptomycin ( $\geq 8$  mg/kg/day) was effective and safe for the  
262 treatment of infective endocarditis, which is mostly caused by methicillin-resistant *S.*  
263 *aureus* and vancomycin-resistant *E. faecium* (20). Similar to the above research, the  
264 present study also showed that the high concentrations of daptomycin (512 mg/L)  
265 combined with fosfomycin had a significantly stronger effect on the mature biofilms  
266 and the adherent cells of the linezolid-resistant isolates than 16xMIC of daptomycin  
267 combined with fosfomycin. Thus, the patients infected with linezolid-resistant *E.*  
268 *faecalis* may also benefit from treatment with high-dose daptomycin, but this issue

269 needs further in vivo studies.

270 Fosfomycin has indicated activity against both Gram-positive and Gram-negative  
271 biofilms, such as *pseudomonas aeruginosa*, *Escherichia coli* and *S. aureus* (21-23).  
272 There are several studies that have reported fosfomycin is effective against *E. faecalis*  
273 biofilms, but this is still controversial. Oliva A *et al* indicated that fosfomycin alone  
274 cleared planktonic bacteria from 74% of cage fluids and eradicated biofilm bacteria  
275 from 43% of cages in their study (12). However, another study found that among  
276 vancomycin-resistant *E. faecalis* and *E. faecium* isolates, fosfomycin alone had no  
277 bactericidal effect on the planktonic and adherent bacteria (13). Our study also  
278 showed that fosfomycin alone had no significantly killing activity on the planktonic  
279 and adherent cells among these linezolid-resistant isolates of *E. faecalis*. Thus, the  
280 role of fosfomycin in *E. faecalis* biofilm infections has not been widely investigated  
281 and needs further confirmation. In addition to the uncertainty of the effect of  
282 fosfomycin alone on the biofilm-related infections, prolonged therapy with  
283 fosfomycin may promote the emergence of fosfomycin-resistant isolates (24). So  
284 fosfomycin is not recommended for monotherapy in clinical practice, and  
285 fosfomycin-included combined treatment may provide better options in these  
286 biofilm-related infections.

287 Rifampin alone or combined with linezolid or vancomycin achieved good effects  
288 on the biofilms of methicillin-resistant *Staphylococcus aureus* (MRSA) strains, and  
289 was even effective against the implant-associated infections which are caused by  
290 MRSA (25-27). However, the role of rifampin in enterococcal infection remains  
291 confusing and controversial. Rifampin was explored effectively against the biofilms  
292 of vancomycin sensitive *E. faecalis* in combination with ciprofloxacin and linezolid in  
293 vitro, and in combination with tigecycline in vivo studies (28, 29). Tang HJ *et al.* also  
294 found that rifampin combined with fosfomycin indicated a synergistic effect on the  
295 planktonic and adherent *E. faecalis* isolates, which are resistant to vancomycin (13).  
296 In contrast to the above results, Oliva A *et al.* found rifampin with no activity against  
297 enterococcal biofilms of *E. faecalis* ATCC19433 (sensitive to vancomycin), either in  
298 vitro or in vivo (12). Another study showed the addition of rifampin even decreased

299 the activity of daptomycin against the biofilms of vancomycin-susceptible *E. faecalis*  
300 (11). However, the present study found the addition of rifampin increased the activity  
301 of daptomycin against the planktonic *E. faecalis* isolates, which are more obvious in  
302 FB-2 and FB-14 strains. This study also found that rifampin increased the activity of  
303 daptomycin on the adherent cells and mature biofilms among FB-14 and FB-80  
304 isolates, but was not observed in FB-1 and FB-2 strains. Based on the previous and  
305 present studies, rifampin indicated disparate effects on the different *E. faecalis*  
306 isolates, and was not related to the antimicrobial susceptibility, such as vancomycin or  
307 linezolid.

308 In conclusion, this study indicated that daptomycin combined with fosfomycin  
309 works effectively against the planktonic and adherent linezolid-resistant isolates of *E.*  
310 *faecalis*. The high concentrations of daptomycin combined with fosfomycin achieved  
311 significantly stronger effect on these isolates. However, the role of rifampin in these  
312 linezolid-resistant isolates of *E. faecalis* is inconsistent and needs more studies to  
313 resolve this issue.

314

## 315 **ACKNOWLEDGMENTS**

316 The authors thank Prof. Xiao-gang Xu (Institute of Antibiotics, Huashan Hospital,  
317 Fudan University, Shanghai, China) for his suggestions on the experiment schemes  
318 and thank MS. Cynthia Brast (University of Florida, Orlando, USA) for her review  
319 on this manuscript.

320

## 321 **FUNDING**

322 This work was supported by grants from the National Natural Science Foundation  
323 of China (grant number 81170370); the Sanming Project of Medicine in Shenzhen  
324 (grant number SMGC201705029); the Shenzhen Scientific Research Program (grant  
325 numbers JCYJ20170412143551332, JCYJ20170307153714512,  
326 JCYJ20170307153425389, JCYJ20170307153919735); the Scientific Research  
327 Project of the Shenzhen Health and Family Planning System (grant number

328 201601058); and the Shenzhen Nanshan District Scientific Research Program of the  
329 People's Republic of China (grant number 2016010).

330

### 331 **CONFLICT of INTEREST**

332 The authors declare that they have no conflicts of interest.

333

### 334 **REFERENCES**

- 335 1. Beganovic M, Luther MK, Rice LB, Arias CA, Rybak MJ, LaPlante KL. 2018. A Review of  
336 Combination Antimicrobial Therapy for *Enterococcus Faecalis* Bloodstream Infections and  
337 Infective Endocarditis. Clin Infect Dis. <https://doi: 10.1093/cid/ciy064>. [Epub ahead of print]
- 338 2. Flokas ME, Karageorgos SA, Detsis M, Alevizakos M, Mylonakis E. 2017.  
339 Vancomycin-resistant enterococci colonisation, risk factors and risk for infection among  
340 hospitalised paediatric patients: a systematic review and meta-analysis. Int J Antimicrob Agents  
341 49: 565-572. <https://doi: 10.1016/j.ijantimicag.2017.01.008>.
- 342 3. Lazaris A, Coleman DC, Kearns AM, Pichon B, Kinnevey PM, Earls MR, *et al.* 2017. Novel  
343 multiresistance cfr plasmids in linezolid-resistant methicillin-resistant *Staphylococcus*  
344 *epidermidis* and vancomycin-resistant *Enterococcus faecium* (VRE) from a hospital outbreak:  
345 co-location of cfr and optrA in VRE. J Antimicrob Chemother 72: 3252-3257. <https://doi: 10.1093/jac/dkx292>.
- 347 4. Sandoe J A, Witherden IR, Cove JH, Heritage J, Wilcox MH. 2003. Correlation between  
348 enterococcal biofilm formation in vitro and medical-device-related infection potential in vivo.  
349 J Med Microbiol 52: 547-550.
- 350 5. Seno Y, Kariyama R, Mitsuhata R, Monden K, Kumon H. 2005. Clinical implications of biofilm  
351 formation by *Enterococcus faecalis* in the urinary tract. Acta Med Okayama 59: 79-87.
- 352 6. Toledo-Arana A, Valle J, Solano C, Arrizubieta M, Cucarella C, Lamata M, *et al.* 2001. The  
353 enterococcal surface protein, Esp, is involved in *Enterococcus faecalis* biofilm formation. Appl  
354 Environ Microbiol 67: 4538-4545.
- 355 7. Dupre I, Zanetti S, Schito AM, Fadda G, Sechi LA. 2003. Incidence of virulence determinants in  
356 clinical *Enterococcus faecium* and *Enterococcus faecalis* isolates collected in Sardinia (Italy). J  
357 Med Microbiol 52: 491-498.
- 358 8. Mohamed JA, Huang W, Nallapareddy SR, Teng F, Murray BE. 2004. Influence of origin of  
359 isolates, specially endocarditis isolates, and various genes on biofilm formation by  
360 *Enterococcus faecalis*. Infect Immun 72: 3658-3663.
- 361 9. Zheng JX, Wu Y, Lin ZW, Pu ZY, Yao WM, Chen Z, *et al.* 2017. Characteristics of and  
362 Virulence Factors Associated with Biofilm Formation in Clinical *Enterococcus faecalis* Isolates  
363 in China. Front Microbiol 8: 2338. <https://doi: 10.3389/fmicb.2017.02338>.
- 364 10. Lewis K. Riddle of biofilm resistance. 2001. Antimicrob Agents Chemother 45: 999-1007.
- 365 11. Luther MK, Arvanitis M, Mylonakis E, LaPlante KL. 2014. Activity of Daptomycin or  
366 Linezolid in Combination with Rifampin or Gentamicin against Biofilm-Forming *Enterococcus*  
367 *faecalis* or *E. faecium* in an In Vitro Pharmacodynamic Model Using Simulated Endocardial  
368 Vegetations and an In Vivo Survival Assay Using *Galleria mellonella* Larvae. Antimicrob  
369 Agents Chemother 58: 4612-4620. <https://doi: 10.1128/AAC.02790-13>.

- 370 **12.** Oliva A, Furustrand Tabin U, Maiolo EM, Jeddari S, Bétrisey B, Trampuz A. 2014. Activities  
371 of Fosfomycin and Rifampin on Planktonic and Adherent *Enterococcus faecalis* Strains in an  
372 Experimental Foreign-Body Infection Model. *Antimicrob Agents Chemother* 58: 1284-1293.  
373 [https://doi: 10.1128/AAC.02583-12](https://doi.org/10.1128/AAC.02583-12).
- 374 **13.** Tang HJ, Chen CC, Zhang CC, Su BA, Li CM, Weng TC, *et al.* 2013. In vitro efficacy of  
375 fosfomycin-based combinations against clinical vancomycin-resistant *Enterococcus* isolates.  
376 *Diagn Microbiol Infect Dis* 77: 254-257. [https://doi: 10.1016/j.diagmicrobio.2013.07.012](https://doi.org/10.1016/j.diagmicrobio.2013.07.012).
- 377 **14.** Wang C, Li M, Dong D, Wang J, Ren J, Otto M, *et al.* 2007. Role of ClpP in biofilm formation  
378 and virulence of *Staphylococcus epidermidis*. *Microbes Infect* 9: 1376-1383.
- 379 **15.** Rice LB, Eliopoulos GM, Moellering RC Jr. 1989. In Vitro Synergism between Daptomycin  
380 and Fosfomycin against *Enterococcus faecalis* Isolates with High-Level Gentamicin  
381 Resistance. *Antimicrob Agents Chemother* 33:470-473.
- 382 **16.** Descourouez JL, Jorgenson MR, Wergin JE, Rose WE. 2013. Fosfomycin Synergy In Vitro  
383 with Amoxicillin, Daptomycin, and Linezolid against Vancomycin-Resistant *Enterococcus*  
384 *faecium* from Renal Transplant Patients with Infected Urinary Stents. *Antimicrob Agents*  
385 *Chemother* 57:1518-1520. [https://doi: 10.1128/AAC.02099-12](https://doi.org/10.1128/AAC.02099-12).
- 386 **17.** Hall Snyder AD, Werth BJ, Nonejuie P, McRoberts JP, Pogliano J, Sakoulas G, *et al.* 2016.  
387 Fosfomycin Enhances the Activity of Daptomycin against Vancomycin-Resistant Enterococci  
388 in an In Vitro Pharmacokinetic-Pharmacodynamic Model. *Antimicrob Agents Chemother*  
389 60:5716-5723. [https://doi: 10.1128/AAC.00687-16](https://doi.org/10.1128/AAC.00687-16).
- 390 **18.** Oliva A, Furustrand Tabin U, Maiolo EM, Jeddari S, Bétrisey B, Trampuz A. 2014. Activities  
391 of Fosfomycin and Rifampin on Planktonic and Adherent *Enterococcus faecalis* Strains in an  
392 Experimental Foreign-Body Infection Model. *Antimicrob Agents Chemother* 58:1284-1293.  
393 [https://doi: 10.1128/AAC.02583-12](https://doi.org/10.1128/AAC.02583-12).
- 394 **19.** Miró JM, Entenza JM, Del Río A, Velasco M, Castañeda X, Garcia de la Mària C, *et al.* 2012.  
395 High-Dose Daptomycin plus Fosfomycin Is Safe and Effective in Treating  
396 Methicillin-Susceptible and Methicillin-Resistant *Staphylococcus aureus* Endocarditis.  
397 *Antimicrob Agents Chemother* 56: 4511-4515.
- 398 **20.** Kullar R, Casapao AM, Davis SL, Levine DP, Zhao JJ, Crank CW, *et al.* 2013. A multicentre  
399 evaluation of the effectiveness and safety of high-dose daptomycin for the treatment of  
400 infective endocarditis. *J Antimicrob Chemother* 68: 2921-2926. [https://doi:](https://doi.org/10.1093/jac/dkt294)  
401 [10.1093/jac/dkt294](https://doi.org/10.1093/jac/dkt294).
- 402 **21.** Mikuniya T, Kato Y, Ida T, Maebashi K, Monden K, Kariyama R, *et al.* 2007. Treatment of  
403 *Pseudomonas aeruginosa* biofilms with a combination of fluoroquinolones and fosfomycin in  
404 a rat urinary tract infection model. *J Infect Chemother* 13: 285-290.
- 405 **22.** Corvec S, Furustrand Tabin U, Bétrisey B, Borens O, Trampuz A. 2013. Activities of  
406 fosfomycin, tigecycline, colistin, and gentamicin against extended-spectrum  
407 lactamase-producing *Escherichia coli* in a foreignbody infection model. *Antimicrob Agents*  
408 *Chemother* 57:1421-1427.
- 409 **23.** Garrigos C, Murillo O, Lora-Tamayo J, Verdaguer R, Tubau F, Cabellos C, *et al.* 2013.  
410 Fosfomycin-daptomycin and other fosfomycin combinations as alternative therapies in  
411 experimental foreign-body infection by methicillin-resistant *Staphylococcus aureus*. *Antimicrob*  
412 *Agents Chemother* 57: 606-610. [https://doi: 10.1128/AAC.01570-12](https://doi.org/10.1128/AAC.01570-12).
- 413 **24.** Raz R. 2012. Fosfomycin: an old-new antibiotic. *Clin Microbiol Infect* 18: 4-7. [https://doi:](https://doi.org/10.1128/AAC.01570-12)

- 414 10.1111/j.1469-0691.2011.03636.x.
- 415 **25.** Zimmerli W, Widmer AF, Blatter M, Frei R, Ochsner PE. 1998. Role of rifampin for treatment  
416 of orthopedic implant-related staphylococcal infections: a randomized controlled trial.  
417 Foreign-Body Infection (FBI) Study Group. JAMA 279: 1537-1541.
- 418 **26.** Baldoni D, Haschke M, Rajacic Z, Zimmerli W, Trampuz A. 2009. Linezolid alone or  
419 combined with rifampin against methicillin-resistant *Staphylococcus aureus* in experimental  
420 foreign-body infection. Antimicrob Agents Chemother 53:1142-1148. [https://doi:](https://doi:10.1128/AAC.00775-08)  
421 10.1128/AAC.00775-08.
- 422 **27.** Vergidis P, Rouse MS, Euba G, Karau MJ, Schmidt SM, Mandrekar JN, *et al.* 2011. Treatment  
423 with linezolid or vancomycin in combination with rifampin is effective in an animal model of  
424 methicillin-resistant *Staphylococcus aureus* foreign body osteomyelitis. Antimicrob Agents  
425 Chemother 55:1182-1186. [https://doi: 10.1128/AAC.00740-10](https://doi:10.1128/AAC.00740-10).
- 426 **28.** Holmberg A, Morgelin M, Rasmussen M. 2012. Effectiveness of ciprofloxacin  
427 or linezolid in combination with rifampicin against *Enterococcus faecalis* in biofilms. J  
428 Antimicrob Chemother 67:433-439. [https://doi: 10.1093/jac/dkr477](https://doi:10.1093/jac/dkr477).
- 429 **29.** Minardi D, Cirioni O, Ghiselli R, Silvestri C, Mocchegiani F, Gabrielli  
430 E, *et al.* 2012. Efficacy of tigecycline and rifampin alone and in combination against  
431 *Enterococcus faecalis* biofilm infection in a rat model of ureteral stent. J Surg Res 176: 1-6.  
432 [https://doi: 10.1016/j.jss.2011.05.002](https://doi:10.1016/j.jss.2011.05.002).

433

434

435

436

437

438

439

440

441

442

443

444

445

446

447

448

449

450

451



452 **Table 1. Antimicrobial susceptibility of *E.faecalis* determined by conventional broth**  
 453 **macrodilution or agar dilution method.**

| Antimicrobial agents    | Susceptibility (mg/L) |                    |      |                    |       |                    |       |                    |
|-------------------------|-----------------------|--------------------|------|--------------------|-------|--------------------|-------|--------------------|
|                         | FB-1                  |                    | FB-2 |                    | FB-14 |                    | FB-80 |                    |
|                         | MIC                   | MBC <sub>log</sub> | MIC  | MBC <sub>log</sub> | MIC   | MBC <sub>log</sub> | MIC   | MBC <sub>log</sub> |
| Ampicillin              | 1                     | 32                 | 1    | 64                 | 2     | 64                 | 2     | 32                 |
| Vancomycin              | 2                     | 128                | 2    | 64                 | 2     | 256                | 2     | 128                |
| Linezolid               | 16                    | >512               | 16   | >512               | 32    | >512               | 16    | >512               |
| Daptomycin              | 4                     | 64                 | 4    | 64                 | 8     | 128                | 4     | 64                 |
| Rifampin                | 4                     | 512                | 4    | 256                | 4     | 512                | 0.5   | 64                 |
| Fosfomycin <sup>a</sup> | 64                    | -                  | 128  | -                  | 64    | -                  | 64    | -                  |
| Gentamicin              | >512                  | >512               | >512 | >512               | 16    | 64                 | 512   | >512               |

454 Note: MIC, minimum inhibitory concentration; MBC<sub>log</sub>, the MBC during the logarithmic growth  
 455 phase; <sup>a</sup>MIC of Fosfomycin: agar dilution method;

456

457

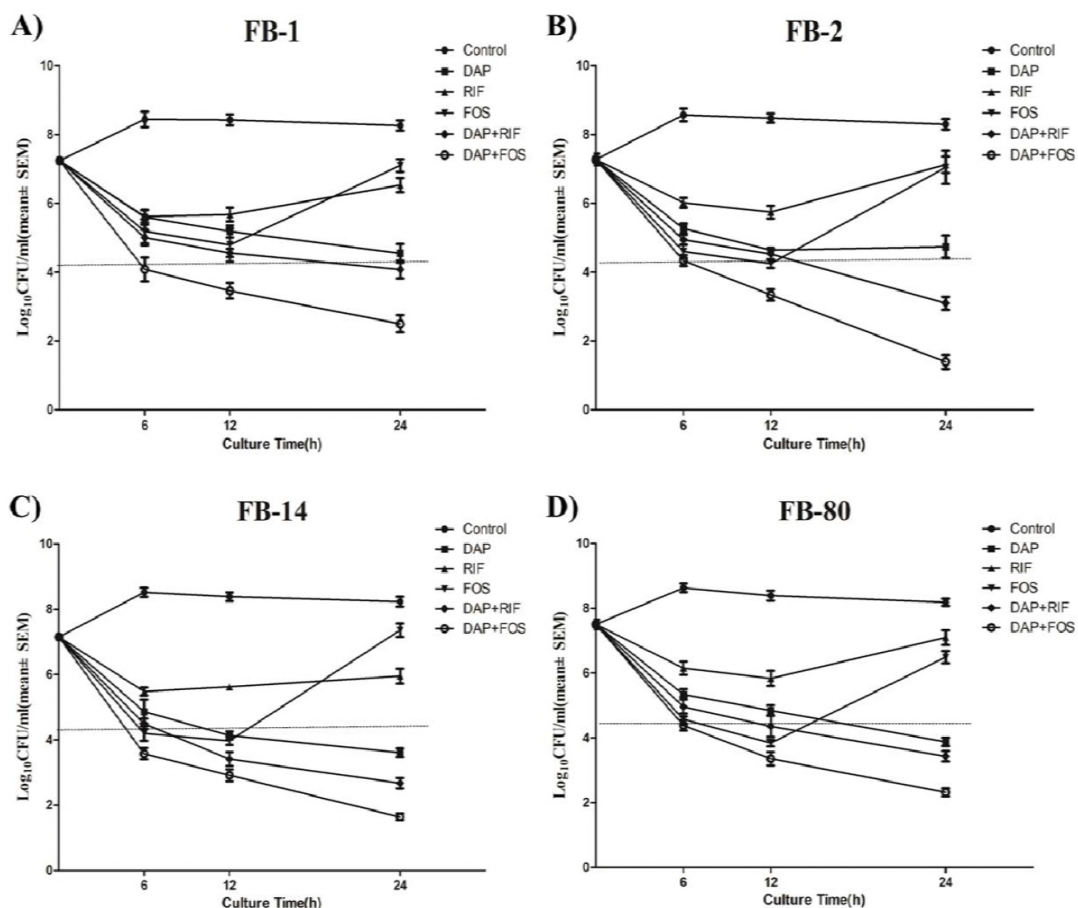

458

459 **Figure. 1 Time-kill studies for FB-1 (A), FB-2 (B), FB-14 (C), and FB-80 (D) during**  
 460 **logarithmic growth.** The horizontal dashed line represents the reduction of 3 log<sub>10</sub> CFU/ml  
 461 compared to the initial bacterial count. DAP, daptomycin; RIF, rifampin; FOS, fosfomycin. All  
 462 the three agents were used at 4xMIC.



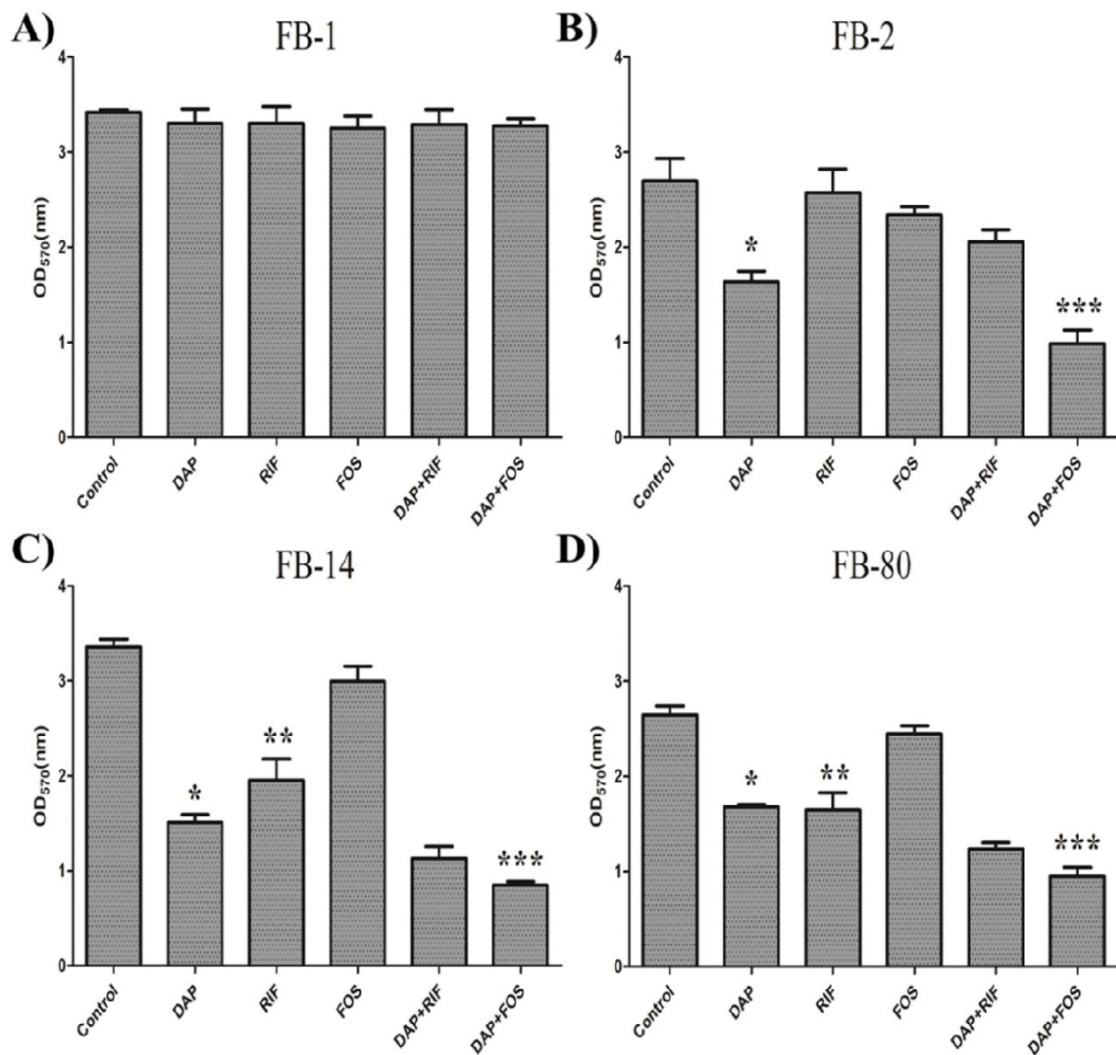

463

464 **Figure. 2 Antimicrobial activity on the mature biofilms of FB-1 (A), FB-2 (B), FB-14 (C), and**

465 **FB-80 (D).** The biofilm biomass of *E. faecalis* was determined by microplate method with crystal

466 violet. DAP, daptomycin; RIF, rifampin; FOS, fosfomycin. All the three agents were used at

467 16xMIC. \*: DAP vs Control, P<0.05; \*\*: RIF vs Control, P<0.05; \*\*\*: DAP+FOS vs DAP or

468 FOS alone, P<0.05.

469

470

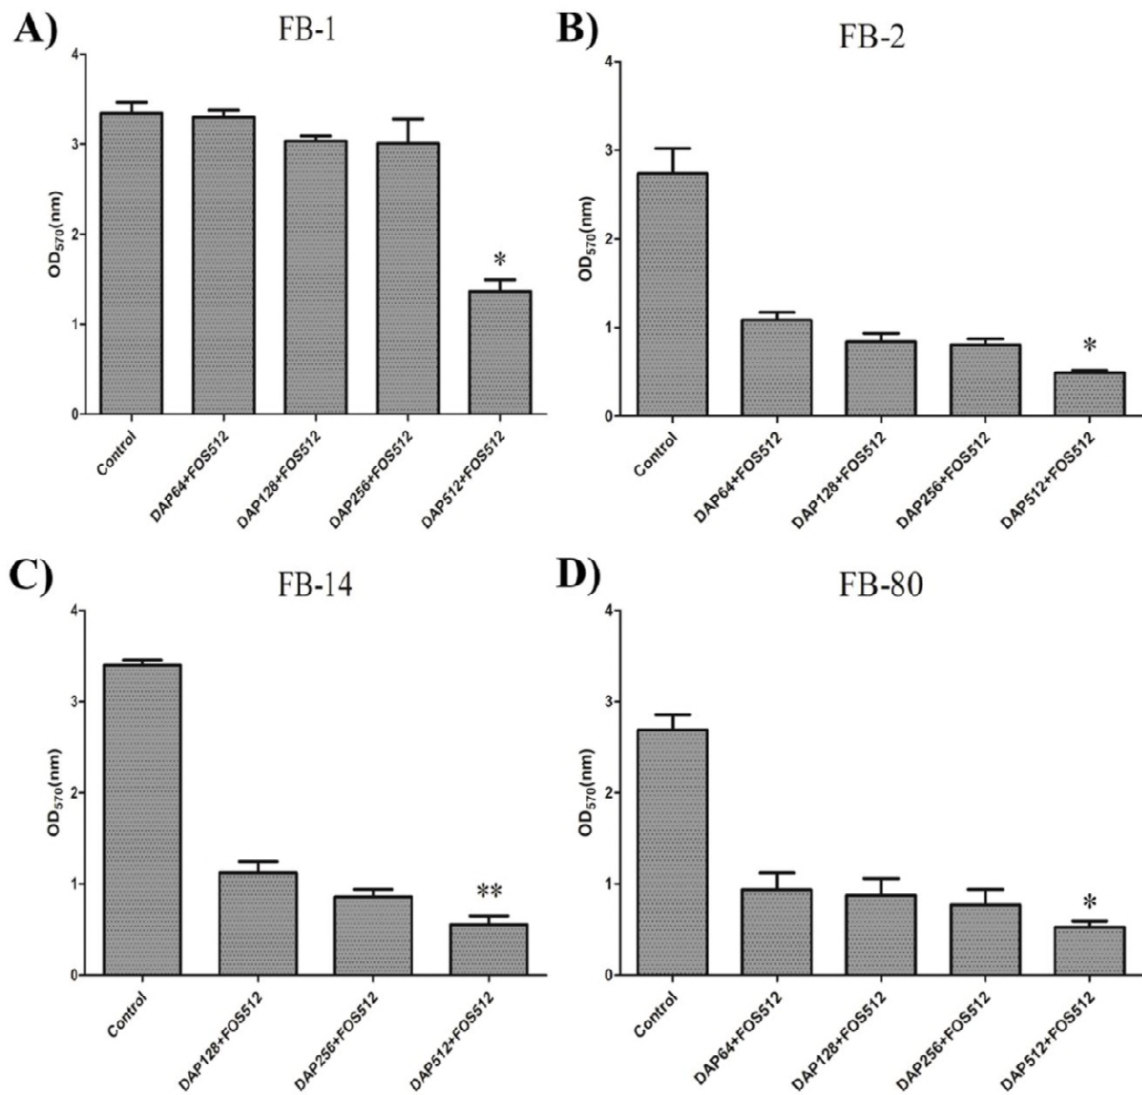

471  
472 **Figure. 3 Antimicrobial activity of daptomycin combined with fosfomycin on the mature**  
473 **biofilms of FB-1 (A), FB-2 (B), FB-14 (C), and FB-80 (D).** DAP, daptomycin, 64 (16xMIC),  
474 128 (32xMIC), 256 (64xMIC), 512 (128xMIC) mg/L were used for FB-1, FB-2, FB-80, and 128  
475 (16xMIC), 256 (32xMIC), 512 (64xMIC) mg/L were used for FB-14; FOS, fosfomycin, 512 mg/L  
476 were used. \*: DAP512+FOS512 vs DAP64+FOS512, P<0.05; \*\*: DAP512+FOS512 vs  
477 DAP128+FOS512, P<0.05.

478  
479  
480  
481  
482  
483  
484  
485  
486  
487

488

489

490

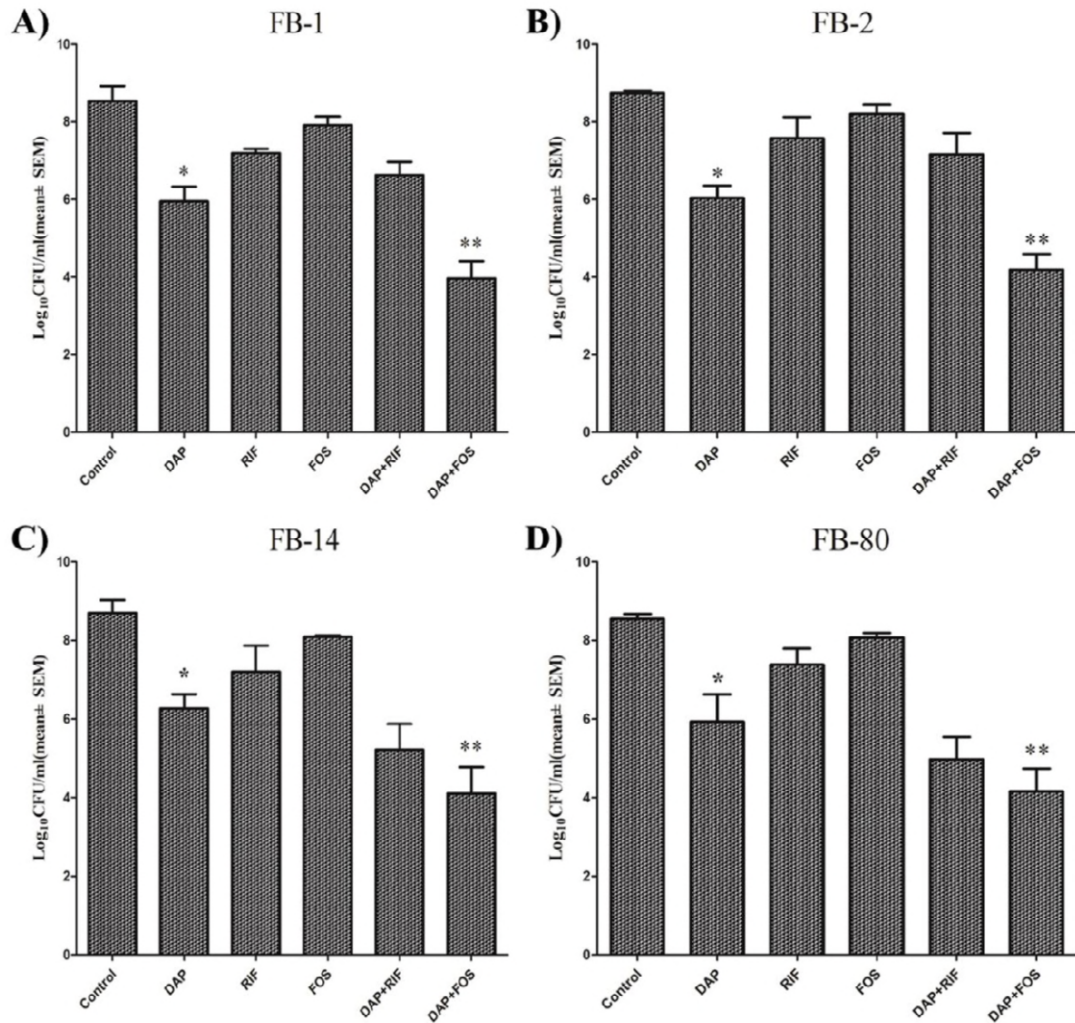

491

492 **Figure. 4 Antimicrobial agents killed the adherent cells in the mature biofilms of FB-1 (A),**

493 **FB-2 (B), FB-14 (C), and FB-80 (D).** The adherent cells in the mature biofilms of *E. faecalis* was

494 determined by the CFU numbers. DAP, daptomycin; RIF, rifampin; FOS, fosfomycin. All the

495 three agents were used at 16xMIC. \*: DAP vs Control, P<0.05; \*\*: DAP+FOS vs DAP or FOS

496 alone, P<0.05.

497

498

499

500

501

502

503

504

505

506

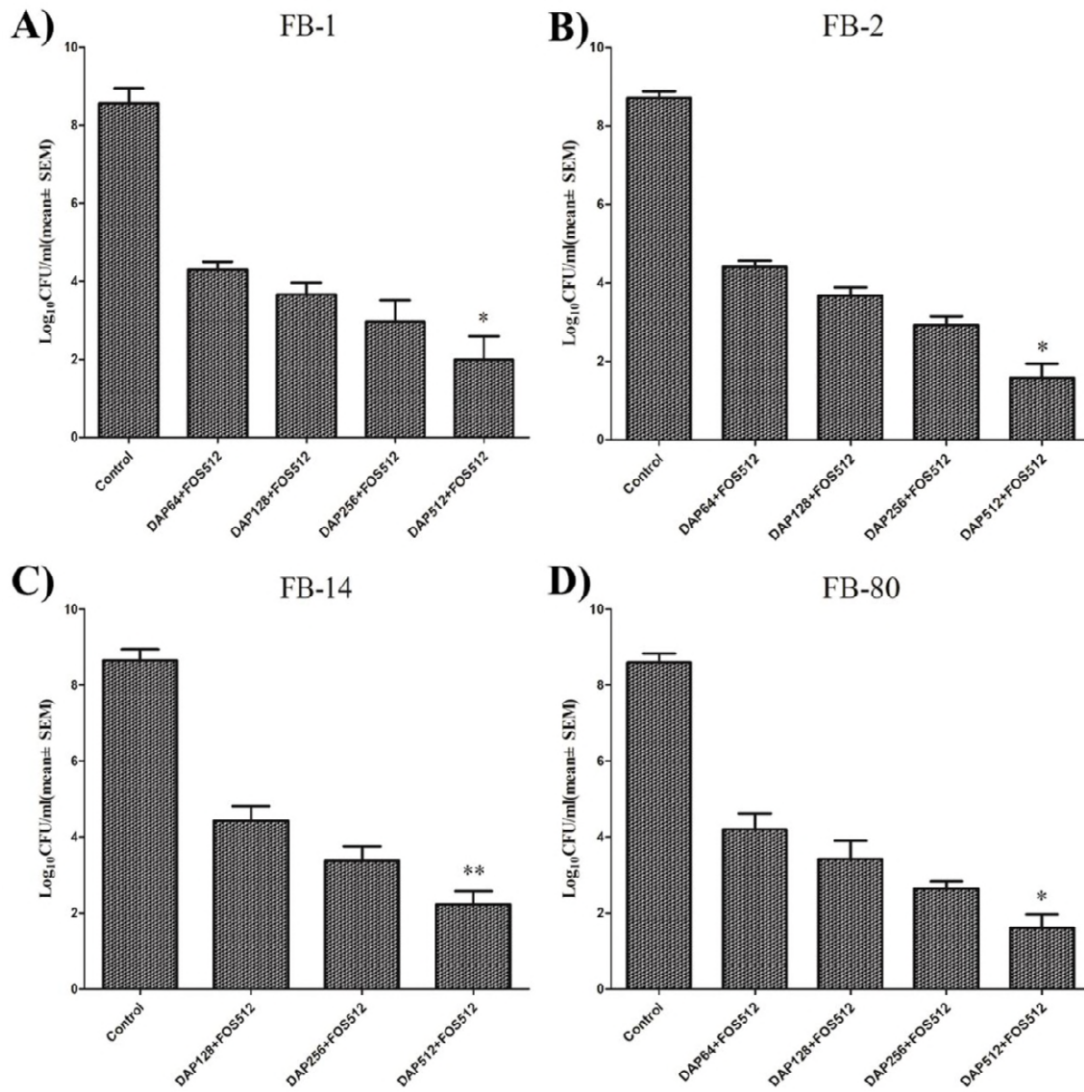

507

508 **Figure. 5 Daptomycin combined with fosfomycin killed the adherent cells in the mature**  
509 **biofilms of FB-1 (A), FB-2 (B), FB-14 (C), and FB-80 (D).** DAP, daptomycin, 64 (16xMIC),  
510 128 (32xMIC), 256 (64xMIC), 512 (128xMIC) mg/L were used for FB-1, FB-2, FB-80, and 128  
511 (16xMIC), 256 (32xMIC), 512 (64xMIC) mg/L were used for FB-14; FOS, fosfomycin, 512 mg/L  
512 were used. \*: DAP512+FOS512 vs DAP64+FOS512,  $P < 0.05$ ; \*\*: DAP512+FOS512 vs  
513 DAP128+FOS512,  $P < 0.05$ .

514

515

516

517

518

519

520

521

522

523



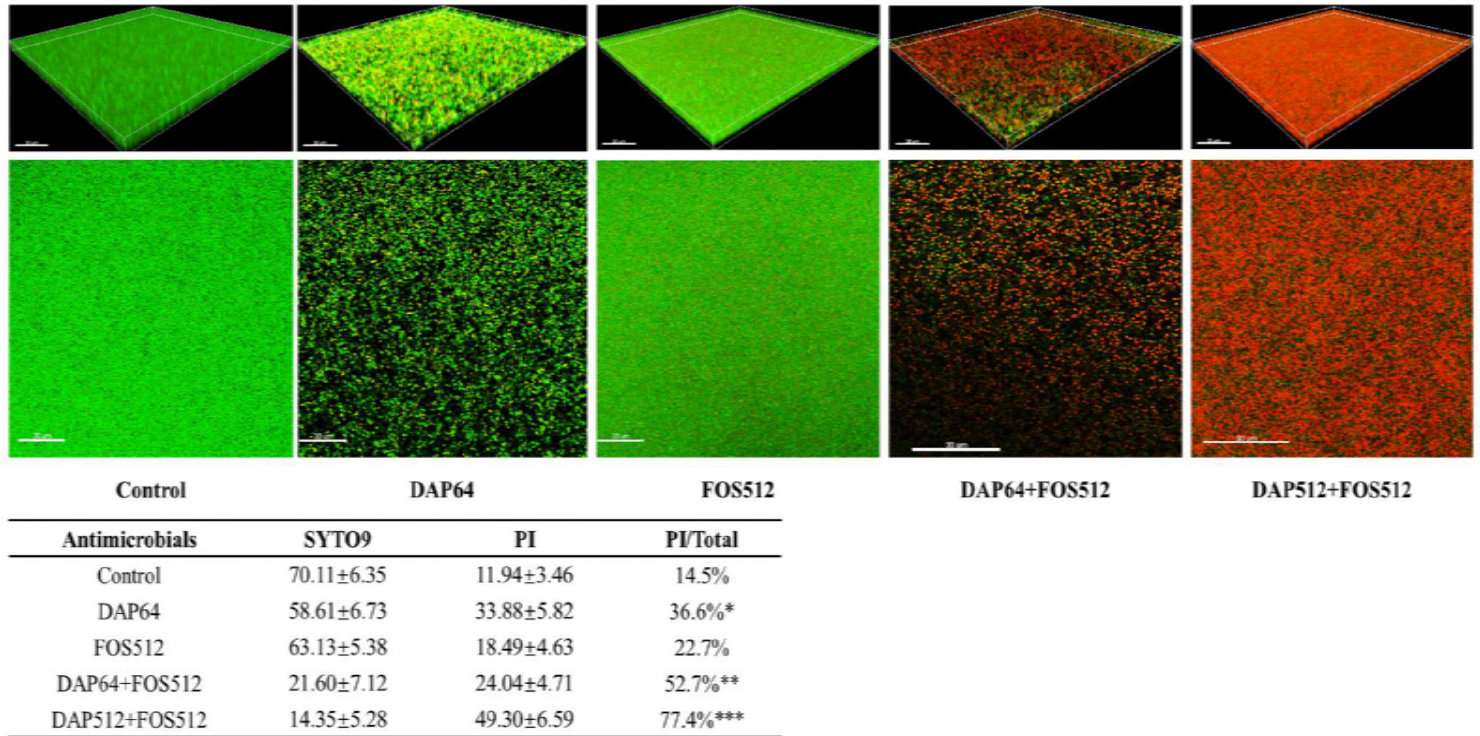

524 **Figure. 6 Effects of daptomycin and fosfomycin on the adherent cells in the mature biofilms**  
 525 **of FB-1 by confocal laser scanning microscope (CLSM).** The mature biofilms were stained with  
 526 SYTO9 and propidium iodide (PI) and observed under a Leica TCS SP8 CLSM. Images were  
 527 analyzed by IMARIS 7.0.0 software. Cells stained with green fluorescence were viable and with  
 528 red fluorescence were dead. The fluorescence quantities of biofilm were determined by  
 529 Leica LAS AF Lite 4.0 software. Data represent mean±SD of three independent experiments.  
 530 DAP, daptomycin, 64 (16xMIC), 512 (128xMIC) mg/L were used; FOS, fosfomycin, 512 mg/L  
 531 were used. \*: DAP64 vs Control, P<0.05; \*\*: DAP64+FOS512 vs DAP64 or FOS512 alone,  
 532 P<0.05; \*\*\*: DAP512+FOS512 vs DAP64+FOS512, P<0.05.

533  
 534  
 535  
 536  
 537  
 538  
 539  
 540  
 541  
 542  
 543  
 544  
 545  
 546  
 547

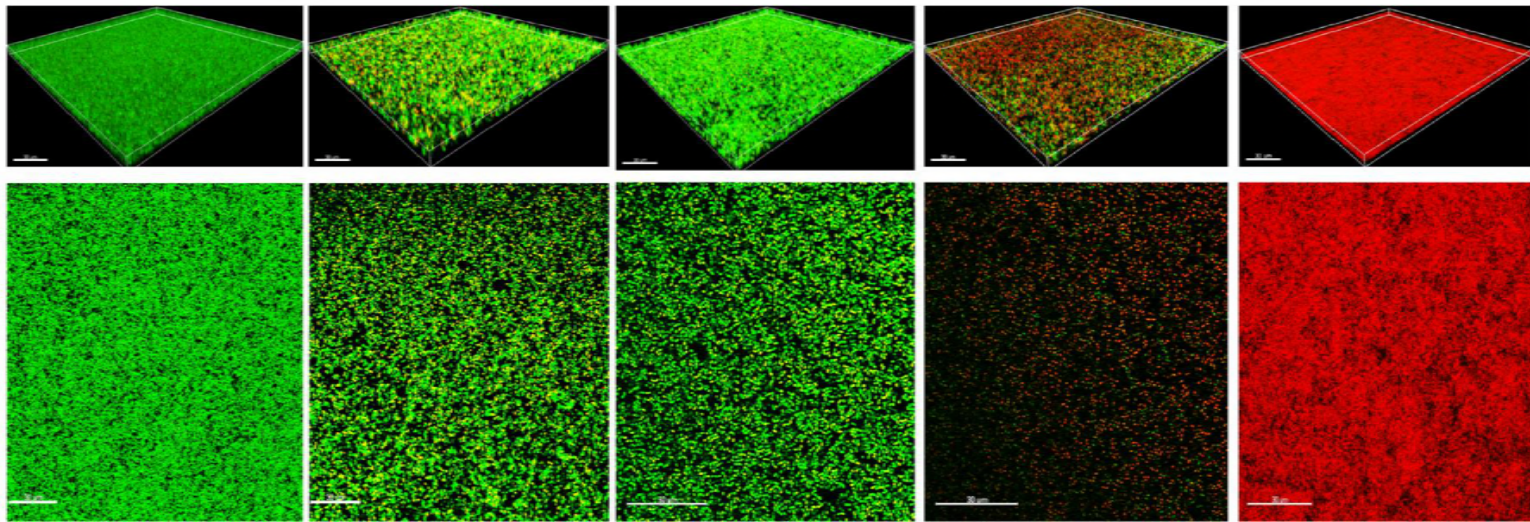

Control

DAP64

FOS512

DAP64+FOS512

DAP512+FOS512

| Antimicrobials | SYTO9      | PI         | PI/Total |
|----------------|------------|------------|----------|
| Control        | 49.41±5.38 | 5.10±2.47  | 9.4%     |
| DAP64          | 65.70±7.83 | 22.79±3.29 | 25.8%*   |
| FOS512         | 56.46±4.62 | 10.42±3.58 | 15.6%    |
| DAP64+FOS512   | 16.26±3.17 | 14.97±3.94 | 47.9%**  |
| DAP512+FOS512  | 6.45±2.85  | 37.53±4.36 | 85.3%*** |

548 **Figure. 7 Effects of daptomycin and fosfomycin on the adherent cells in the mature biofilms**  
 549 **of FB-2 by confocal laser scanning microscope (CLSM).** The mature biofilms were stained with  
 550 SYTO9 and propidium iodide (PI) and observed under a Leica TCS SP8 CLSM. Images were  
 551 analyzed by IMARIS 7.0.0 software. Cells stained with green fluorescence were viable and with  
 552 red fluorescence were dead. The fluorescence quantities of biofilm were determined by  
 553 Leica LAS AF Lite 4.0 software. Data represent mean±SD of three independent experiments.  
 554 DAP, daptomycin, 64 (16xMIC), 512 (128xMIC) mg/L were used; FOS, fosfomycin, 512 mg/L  
 555 were used. \*: DAP64 vs Control, P<0.05; \*\*: DAP64+FOS512 vs DAP64 or FOS512 alone,  
 556 P<0.05; \*\*\*: DAP512+FOS512 vs DAP64+FOS512, P<0.05.

557

558

559

560

561

562

563

564

565

566

567

568

569



570

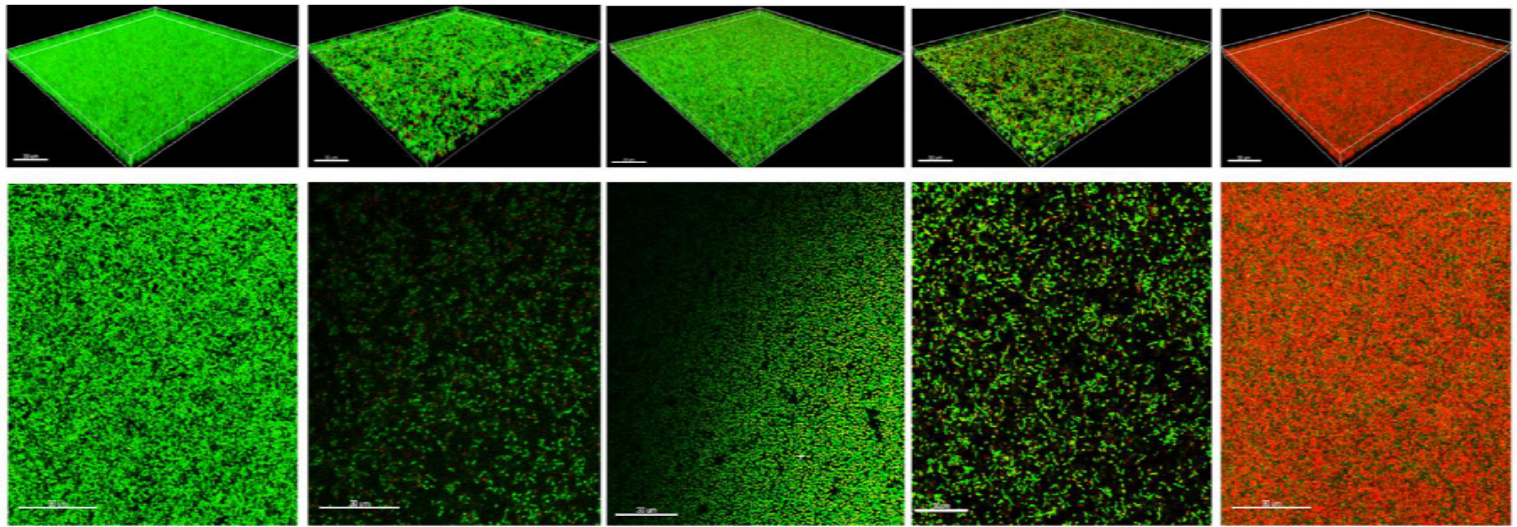

Control

DAP128

FOS512

DAP128+FOS512

DAP512+FOS512

| Antimicrobials | SYTO9      | PI         | PI/Total |
|----------------|------------|------------|----------|
| Control        | 82.29±5.58 | 15.37±3.84 | 15.7%    |
| DAP128         | 66.20±4.92 | 29.73±4.84 | 31.0%*   |
| FOS512         | 74.58±5.43 | 18.92±3.67 | 20.2%    |
| DAP128+FOS512  | 64.65±6.38 | 55.36±5.75 | 46.1%**  |
| DAP512+FOS512  | 32.34±4.61 | 76.37±7.26 | 70.3%*** |

571 **Figure. 8 Effects of daptomycin and fosfomycin on the adherent cells in the mature biofilms**  
 572 **of FB-14 by confocal laser scanning microscope (CLSM).** The mature biofilms were stained  
 573 with SYTO9 and propidium iodide (PI) and observed under a Leica TCS SP8 CLSM. Images were  
 574 analyzed by IMARIS 7.0.0 software. Cells stained with green fluorescence were viable and with  
 575 red fluorescence were dead. The fluorescence quantities of biofilm were determined by  
 576 Leica LAS AF Lite 4.0 software. Data represent mean±SD of three independent experiments.  
 577 DAP, daptomycin, 128 (16xMIC), 512 (64xMIC) mg/L were used; FOS, fosfomycin, 512 mg/L  
 578 were used. \*: DAP128 vs Control, P<0.05; \*\*: DAP128+FOS512 vs DAP128 or FOS512 alone,  
 579 P<0.05; \*\*\*: DAP512+FOS512 vs DAP128+FOS512, P<0.05.

580

581

582

583

584

585

586

587

588

589

590

591

592



593

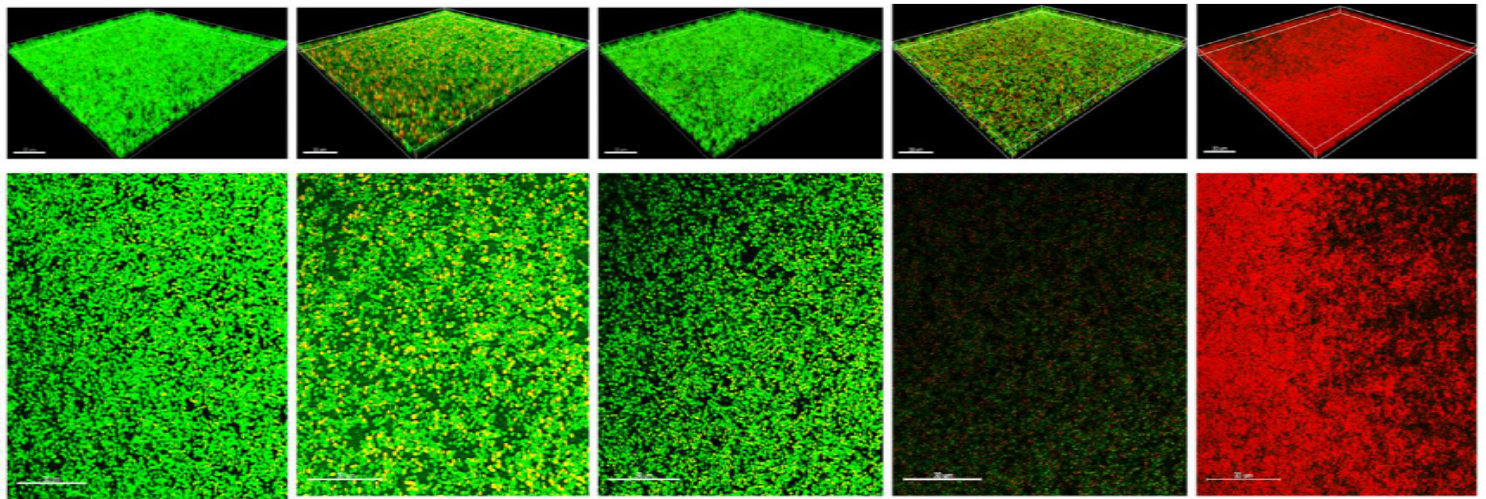

|                       | Control      | DAP64      | FOS512          | DAP64+FOS512 | DAP512+FOS512 |
|-----------------------|--------------|------------|-----------------|--------------|---------------|
| <b>Antimicrobials</b> | <b>SYTO9</b> | <b>PI</b>  | <b>PI/Total</b> |              |               |
| Control               | 93.71±6.26   | 9.71±2.14  | 9.4%            |              |               |
| DAP64                 | 79.99±5.86   | 25.59±3.46 | 24.2%*          |              |               |
| FOS512                | 82.65±6.02   | 15.76±3.25 | 16.0%           |              |               |
| DAP64+FOS512          | 60.08±4.54   | 57.66±5.38 | 49.0%**         |              |               |
| DAP512+FOS512         | 7.90±2.36    | 31.85±4.62 | 80.1%***        |              |               |

594 **Figure. 9 Effects of daptomycin and fosfomycin on the adherent cells in the mature biofilms**  
 595 **of FB-80 by confocal laser scanning microscope (CLSM).** The mature biofilms were stained  
 596 with SYTO9 and propidium iodide (PI) and observed under a Leica TCS SP8 CLSM. Images were  
 597 analyzed by IMARIS 7.0.0 software. Cells stained with green fluorescence were viable and with  
 598 red fluorescence were dead. The fluorescence quantities of biofilm were determined by  
 599 Leica LAS AF Lite 4.0 software. Data represent mean±SD of three independent experiments.  
 600 DAP, daptomycin, 64 (16xMIC), 512 (128xMIC) mg/L were used; FOS, fosfomycin, 512 mg/L  
 601 were used. \*: DAP64 vs Control, P<0.05; \*\*: DAP64+FOS512 vs DAP64 or FOS512 alone,  
 602 P<0.05; \*\*\*: DAP512+FOS512 vs DAP64+FOS512, P<0.05.  
 603
